# Supplementary material for: Anxiety Symptoms Questionnaire (ASQ): development and validation
Source: PubMed Central journal article supplement — Gen Psychiatr. 2019 Dec 18;32(6):e100144. doi: 10.1136/gpsych-2019-100144 (PMC6936972; doi:10.1136/gpsych-2019-100144), 2019-12-18
Supplement: gpsych-2019-100144supp001.pdf [file gpsych-2019-100144supp001.pdf]

## Appendix

**ANXIETY SYMPTOMS QUESTIONNAIRE (ASQ)**

Please read each item and **fill each box with the number** in the scales below that best describes your experience regarding the Intensity(A) and Frequency (B) of these symptoms:

**A. USE THIS SCALE TO COMPLETE COLUMN (A) BELOW**

How **INTENSE** or **BOTHERSOME** the symptom(s) have been **in the past week**, using the following scale:

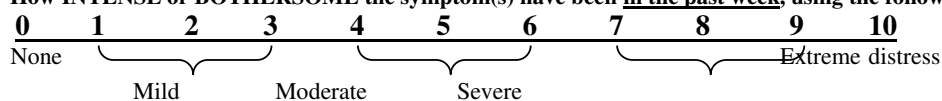**B. USE THIS SCALE TO COMPLETE COLUMN (B) BELOW**

How **FREQUENTLY** have you experienced the symptom(s) **in the past week**, using the following scale:

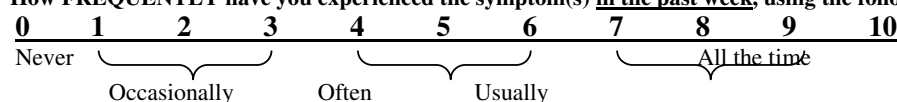

|                                                                                                                                       | <b>A</b>                       | <b>B</b>                       |
|---------------------------------------------------------------------------------------------------------------------------------------|--------------------------------|--------------------------------|
| <b>IN THE PAST WEEK:</b>                                                                                                              | <b>INTENSITY<br/>(0 to 10)</b> | <b>FREQUENCY<br/>(0 to 10)</b> |
| 1. Anxiety                                                                                                                            |                                |                                |
| 2. Nervousness                                                                                                                        |                                |                                |
| 3. Worrying                                                                                                                           |                                |                                |
| 4. Irritability                                                                                                                       |                                |                                |
| 5. Muscle Tension or Tightness                                                                                                        |                                |                                |
| 6. Trouble Relaxing                                                                                                                   |                                |                                |
| 7. Trouble Falling or Staying Asleep<br><i>(Rate the most troublesome symptom)</i>                                                    |                                |                                |
| 8. Fatigue or Lack of Energy                                                                                                          |                                |                                |
| 9. Problems with Concentration or Attention                                                                                           |                                |                                |
| 10. Trouble Remembering Things                                                                                                        |                                |                                |
| 11. Shortness of Breath, Chest Tightness or Pain,<br>Pounding/Skipping/Racing Heartbeat<br><i>(Rate the most troublesome symptom)</i> |                                |                                |
| 12. Stomach Upset, Nausea, Constipation, Diarrhea, or<br>Irritable Bowels <i>(Rate the most troublesome symptom)</i>                  |                                |                                |
| 13. Dizziness, Lightheadedness, Headaches, Trembling or<br>Shakiness <i>(Rate the most troublesome symptom)</i>                       |                                |                                |
| 14. Numbness, Tingling, Excessive Sweating, Flushing or<br>Frequent Urination <i>(Rate the most troublesome symptom)</i>              |                                |                                |
| 15. Feeling Restless, Keyed Up, or On Edge                                                                                            |                                |                                |
| 16. Anticipating or Fearing Something Bad Might Happen                                                                                |                                |                                |
| 17. Trouble Functioning at Home, Work, or Socially<br><i>Due to Anxiety (Rate the most troublesome symptom)</i>                       |                                |                                |

Copyright: Drs. Mark Pollack, Maurizio Fava and Naomi Simon
